# Supplementary material for: Synthesis, Optical Properties, and Fluorescence Cell Imaging of Novel Mixed Fluorinated Subphthalocyanines
Source: MDPI journal article supplement (doi:10.3390/molecules28020725), 2023-01-11
Supplement: s1 [file s1]

# Synthesis, Optical Properties and Fluorescence Cell Imaging of Novel Mixed Fluorinated Subphthalocyanines

Shutong Zhou<sup>1</sup>, Xiaojuan Lv<sup>2</sup>, Minghui Li<sup>1</sup>, Zijian Gao<sup>1</sup>, Shengnan Tu<sup>1</sup>, Shanshan Qiao<sup>1</sup>, Mengjia Mo<sup>1</sup>, Xu Tang<sup>3</sup>, Yemei, Wang<sup>1\*</sup>, Shasha Sun<sup>1\*</sup>

<sup>1</sup>School of Environmental and Chemical Engineering, Jiangsu University of Science and Technology, Zhenjiang 212013, China

<sup>2</sup>School of Chemistry and Chemical Engineering, Jiangsu University, Zhenjiang 212013, China

<sup>3</sup>Institute for Advanced Materials, School of Materials Science and Engineering, Jiangsu University, Zhenjiang 212013, China

\*Correspondence: [wangym@just.edu.cn](mailto:wangym@just.edu.cn), Tel.: +86-15365996930; [sunshasha@just.edu.cn](mailto:sunshasha@just.edu.cn);

## Supplementary Materials

### Table of Contents

- i. Experimental Section
- ii. HRMS Spectra
- iii. NMR Spectra
- iv. IR Spectra
- v. Crystallographic Data
- vi. TD-DFT Calculation Results
- vii. References

## i. Experimental Section

**General information:** Unless noted, all reagents or solvents were obtained from commercial suppliers and used without further purification. All air sensitive experiments were performed in N<sub>2</sub> atmosphere through Schlenk technology. <sup>1</sup>H, <sup>13</sup>C, <sup>19</sup>F and <sup>11</sup>B NMR spectra were recorded on a JNM-ECZ400S/L1 spectrometer (operating as 400 MHz for <sup>1</sup>H, 100 MHz for <sup>13</sup>C, 376 MHz for <sup>19</sup>F and 128 MHz for <sup>11</sup>B) using the residual solvent as the internal reference for <sup>1</sup>H ( $\delta$  = 7.26 ppm in CDCl<sub>3</sub>), <sup>13</sup>C ( $\delta$  = 76.8 ppm in CDCl<sub>3</sub>), and CF<sub>3</sub>COOH as the external reference for <sup>19</sup>F ( $\delta$  = -76.5 ppm). <sup>1</sup>H and <sup>19</sup>F NMR spectra were acquired with Single Plus Experiment (SPE) with a pulse length of 3.06  $\mu$ s and a recycle delay of 5 s. <sup>13</sup>C NMR spectra were acquired with Single Plus Experiment (SPE) with a pulse length of 3.30  $\mu$ s and a recycle delay of 2 s. <sup>11</sup>B NMR spectra were acquired with Single Plus Experiment (SPE) with a pulse length of 3.33  $\mu$ s and a recycle delay of 2 s. Mass spectra were conducted at Thermo Scientific Q Exactive Focus LC-MS/MS (APCI). A Hitachi F-4600 fluorescence spectrophotometer was used to measure fluorescence spectrum. An Edinburgh FLS-980 spectrometer was used to determine fluorescence quantum yield. The Fourier transform infrared (FT-IR) spectra of the samples were recorded on a Thermo Scientific Nicolet iS50 spectrometer in the spectral range of 4000–400 cm<sup>-1</sup> with 16 scans and a resolution of 8 cm<sup>-1</sup>. Melting point of samples were recorded on a melting point tester of Tianfen-RY-51. Preparative separations were performed using silica gel column chromatography (Shanghai test Silica Gel 60N, spherical, neutral, 300-400 mesh). Thin-layer chromatography (TLC) was performed with aluminum sheet silica gel 60 F<sub>254</sub> (Merck).

**X-ray Analysis:** Single crystal of **6** was obtained by the slow diffusion of n-hexane into a CH<sub>2</sub>Cl<sub>2</sub> solution of them. X-ray crystallographic data for **6** (CCDC: 2220751) was recorded at 296 K on a Bruker APEX DUO diffractometer using graphite-monochromate Mo-K $\alpha$  radiation from the corresponding set of confocal optics. The structures were solved by a direct method (SHELXT)<sup>[s1]</sup> and refined using a full-matrix least squares technique (SHELXL)<sup>[s2, s3]</sup>.

**Cyclic voltammetry:** The cyclic voltammetry was conducted in a solution of 0.1 M TBAP in dry-CH<sub>2</sub>Cl<sub>2</sub> with a scan rate of 0.1 V s<sup>-1</sup> in an argon-filled cell. A glassy carbon electrode and a platinum wire were used as a working and a counter electrode, respectively. A saturated Calomel electrode (SCE) was used as reference electrodes.

**Computational methods:** Gaussian 9 software packages were used to carry out density functional theory (DFT) and time-dependent DFT (TDDFT) calculations using a B3LYP functional with a 6-31G(d) basis sets.

**Cell culture:** For cell culture, cells were seeded in cell culture plates using Dulbecco's modified Eagle's medium (DMEM) with 10% fetal bovine serum (FBS) and incubated at 37% under a humidified atmosphere with 5% CO<sub>2</sub> for 24 h to reach 80% confluence.

## ii. HRMS Spectra

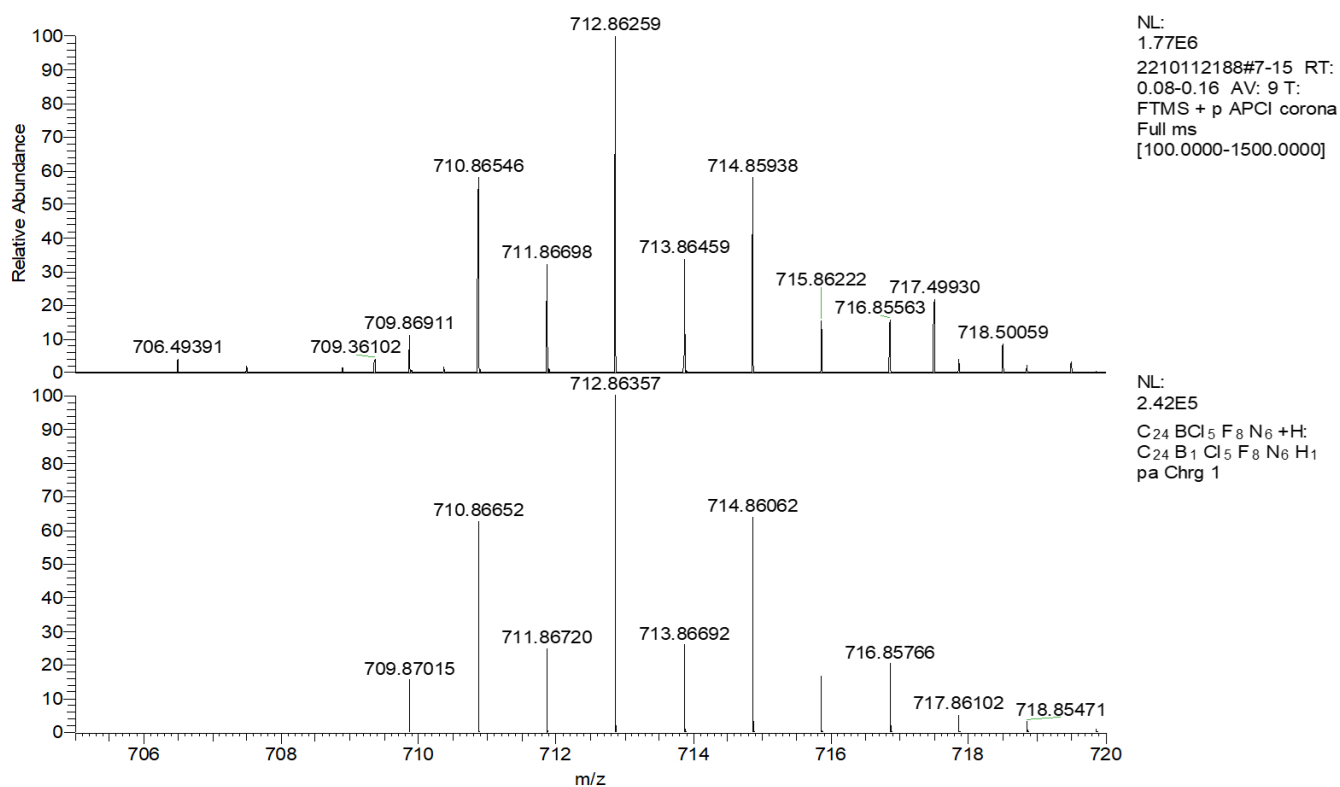

Figure S1. HR-APCI-MS spectrum of 5.

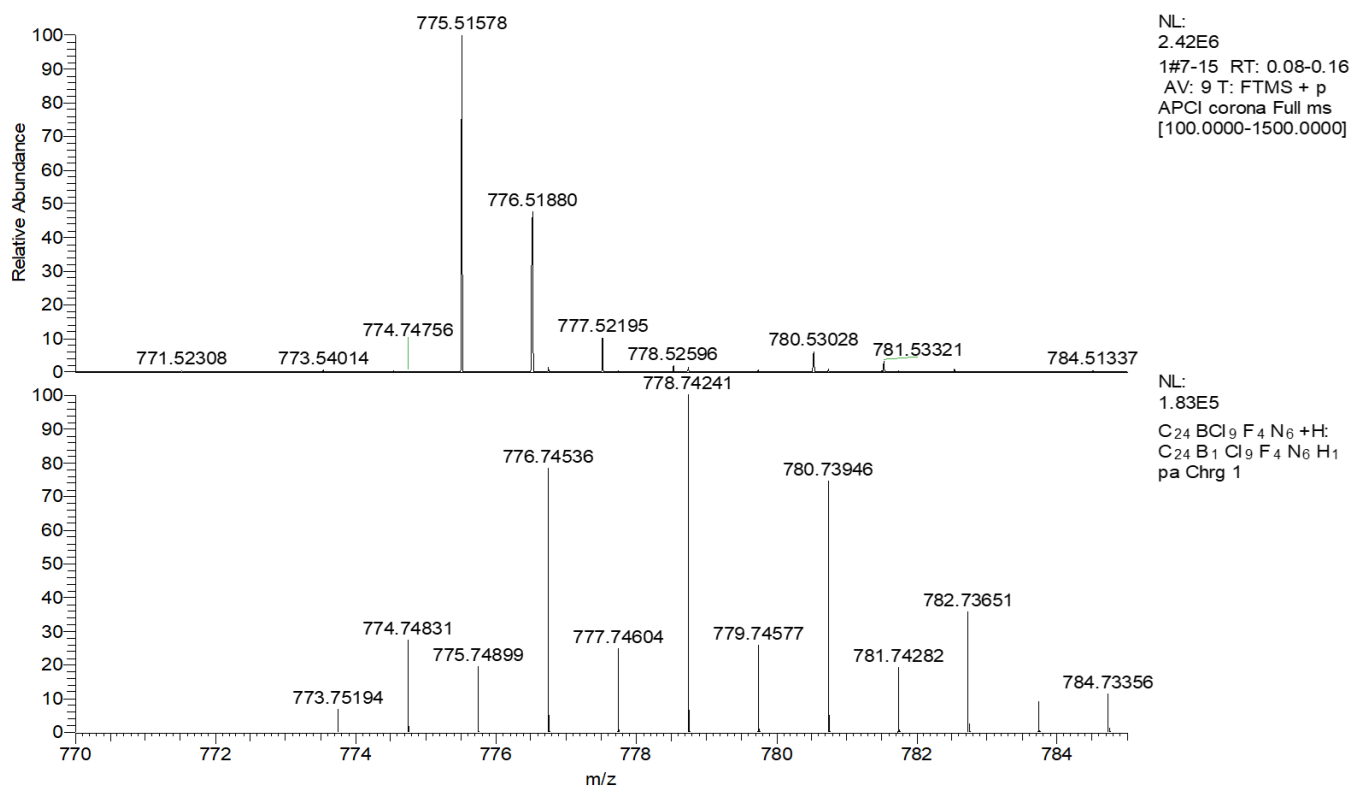

Figure S2. HR-APCI-MS spectrum of 6.

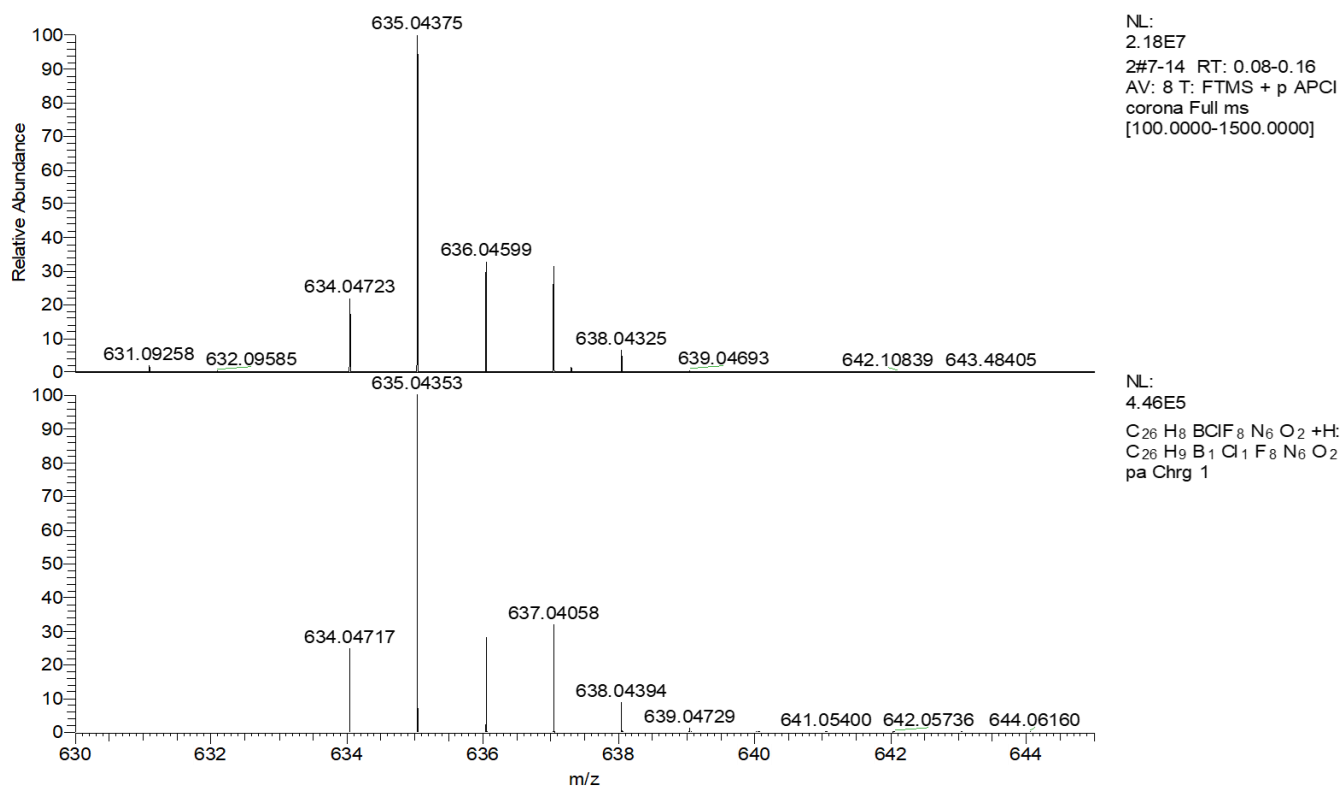

Figure S3. HR-APCI-MS spectrum of 7.

### iii. NMR Spectra

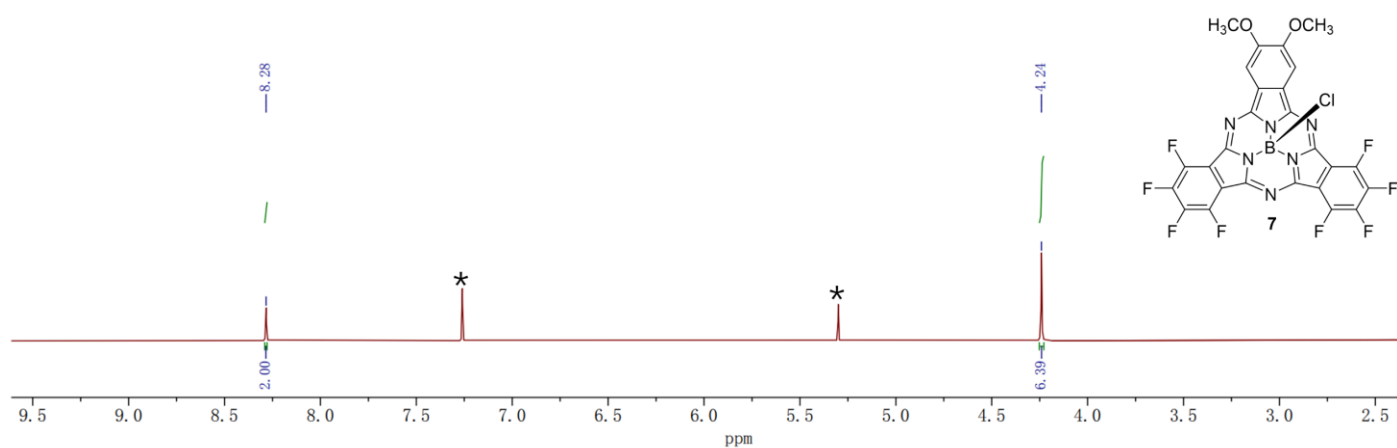

**Figure S4.** <sup>1</sup>H NMR spectrum of 7 in CDCl<sub>3</sub> (\* residual solvent).

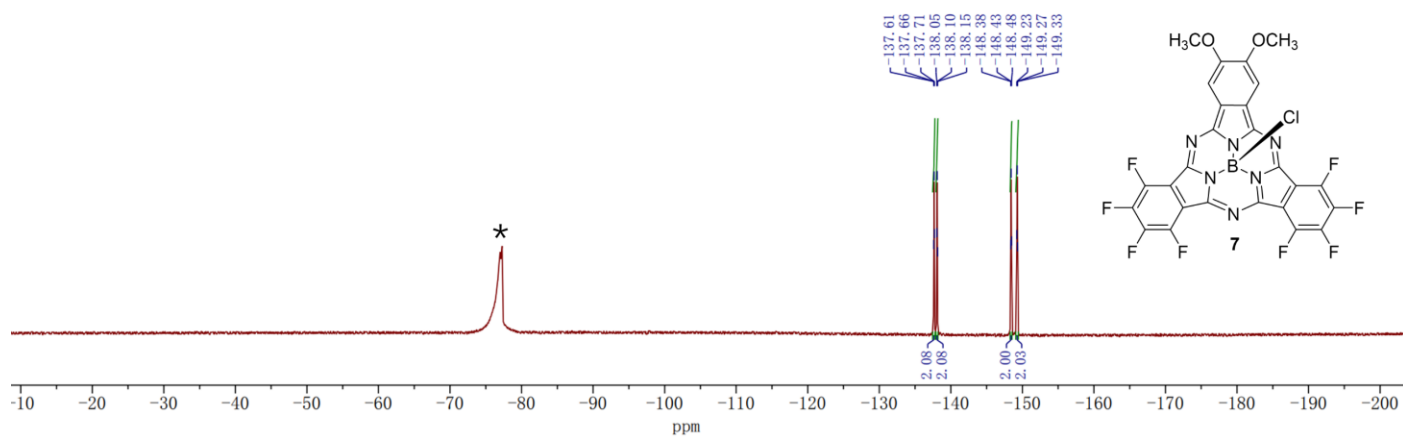

**Figure S5.** <sup>19</sup>F NMR spectrum of 7 in CDCl<sub>3</sub> (\* CF<sub>3</sub>COOH as reference).

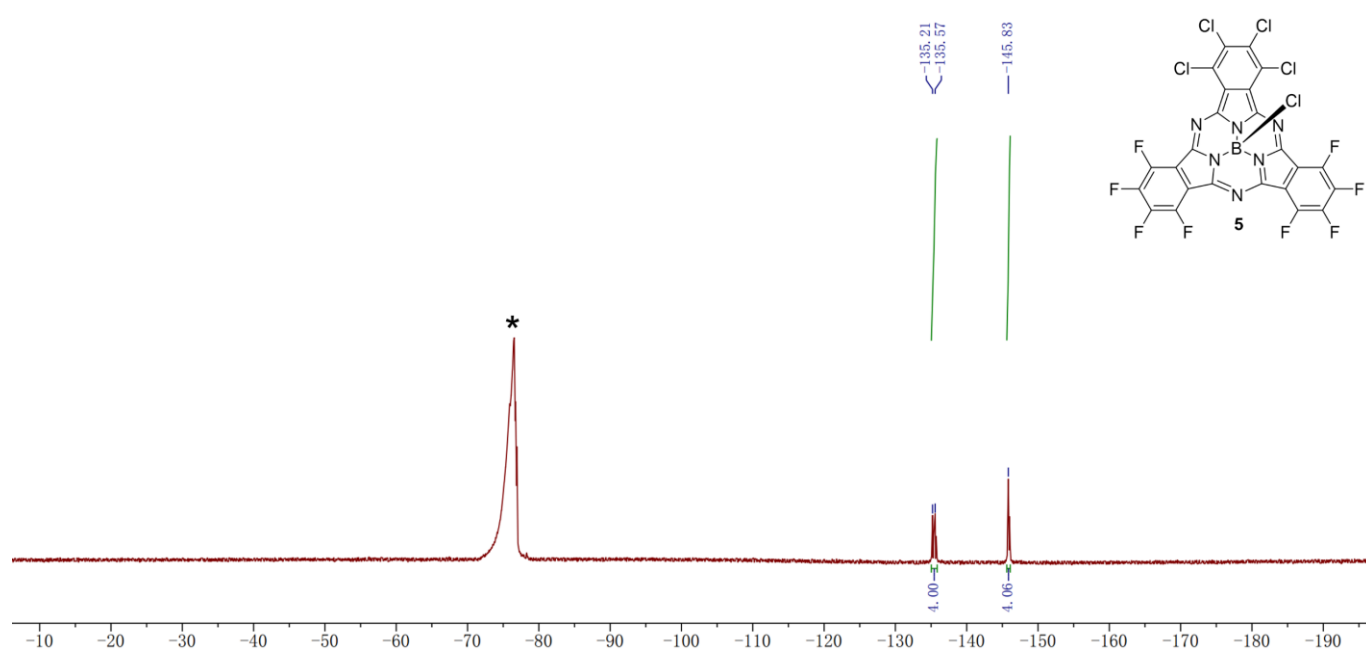

**Figure S6.** <sup>19</sup>F NMR spectrum of 5 in CDCl<sub>3</sub> (\* CF<sub>3</sub>COOH as reference).

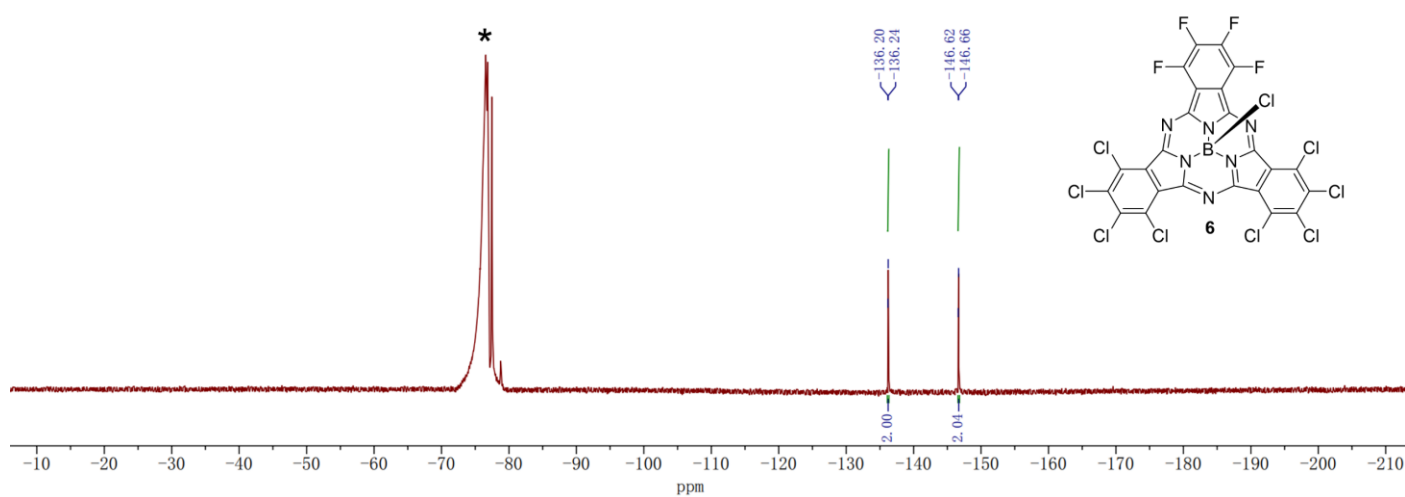

**Figure S7.**  $^{19}\text{F}$  NMR spectrum of **6** in  $\text{CDCl}_3$  (\*  $\text{CF}_3\text{COOH}$  as reference).

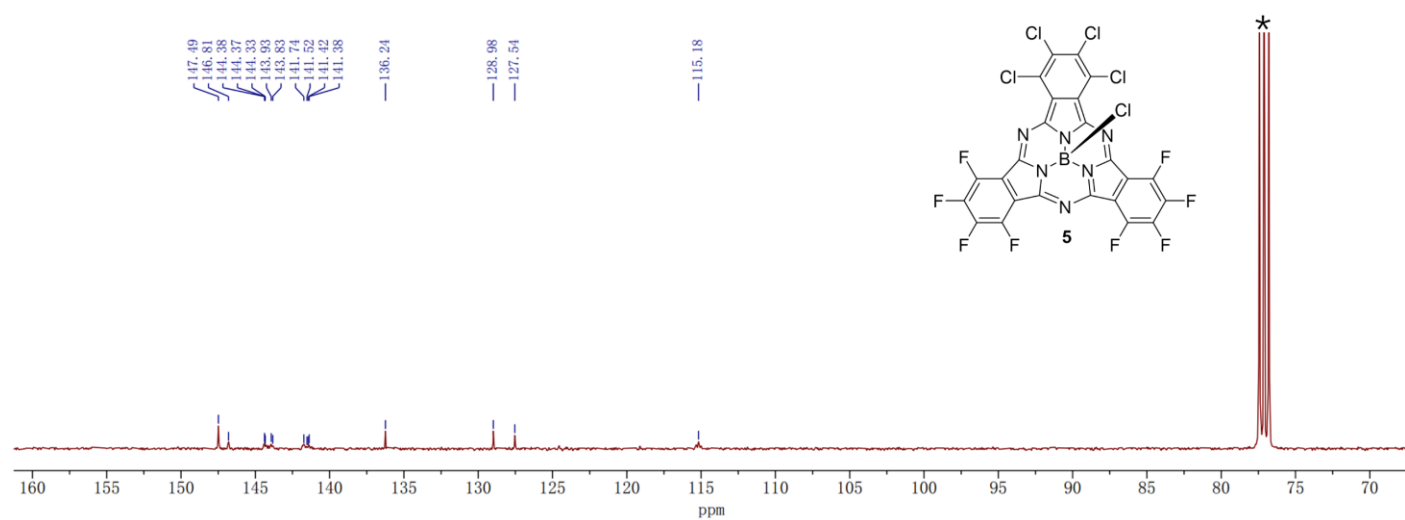

**Figure S8.**  $^{13}\text{C}$  NMR spectrum of **5** in  $\text{CDCl}_3$  (\* residual solvent).

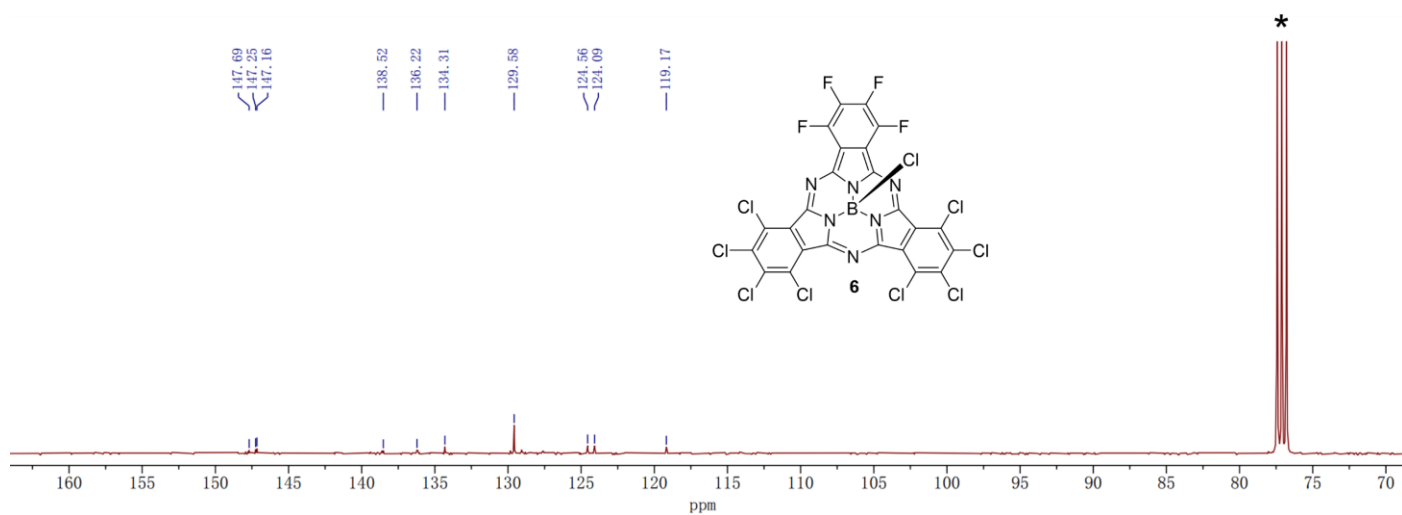

**Figure S9.** <sup>13</sup>C NMR spectrum of **6** in CDCl<sub>3</sub> (\* residual solvent).

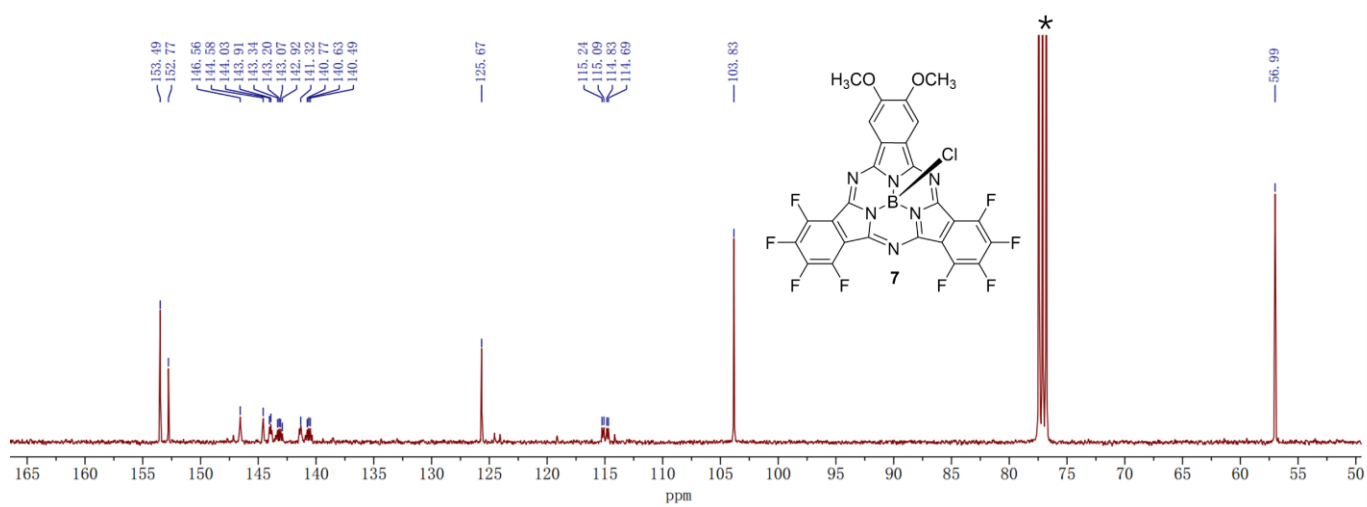

**Figure S10.** <sup>13</sup>C NMR spectrum of **7** in CDCl<sub>3</sub> (\* residual solvent).

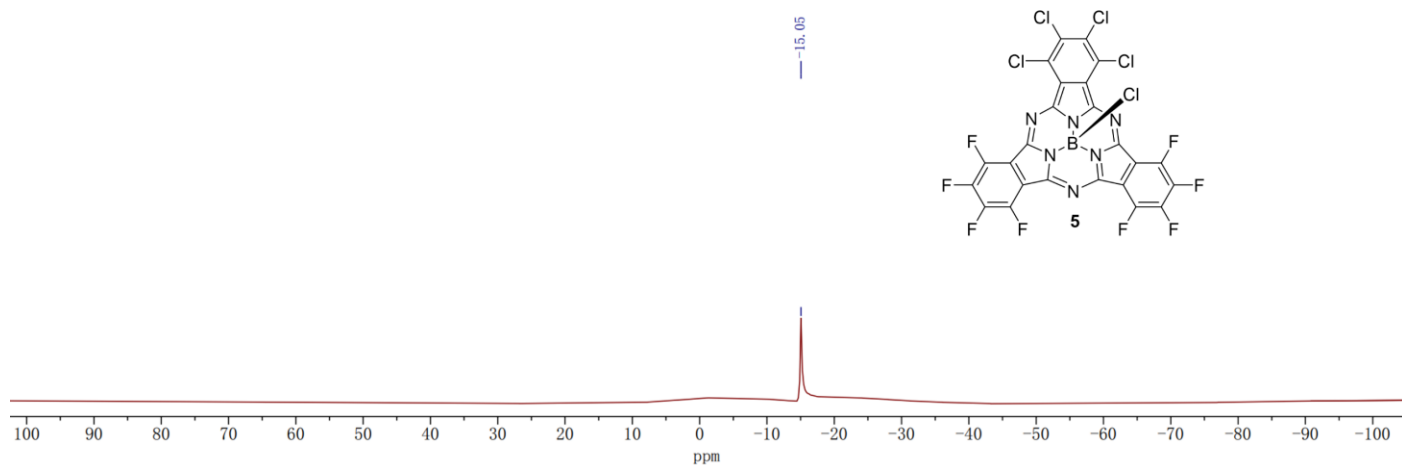

**Figure S11.**  $^{11}\text{B}$  NMR spectrum of **5** in  $\text{CDCl}_3$  (\* residual solvent).

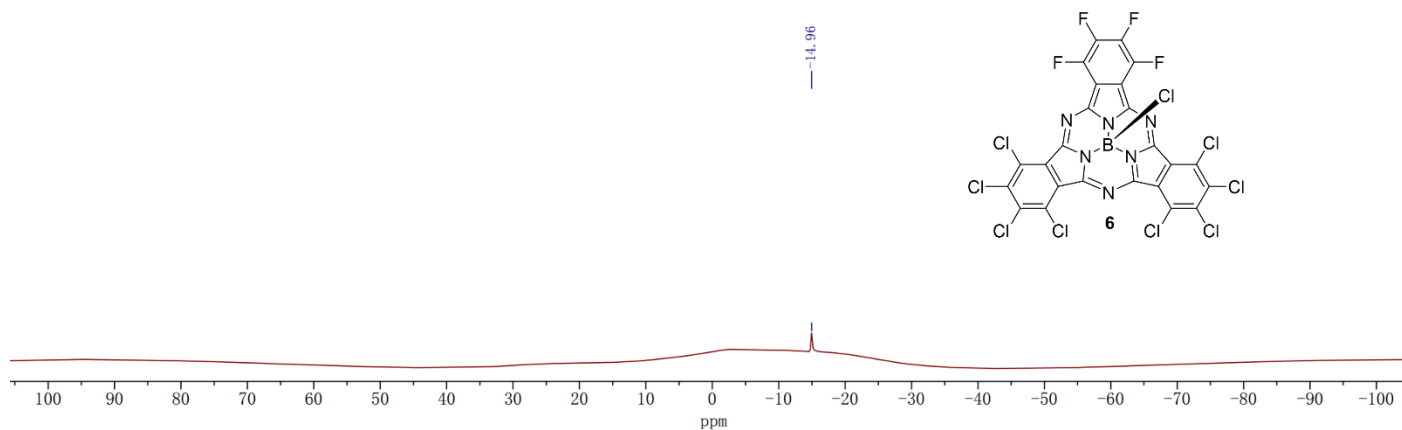

**Figure S12.**  $^{11}\text{B}$  NMR spectrum of **6** in  $\text{CDCl}_3$ .

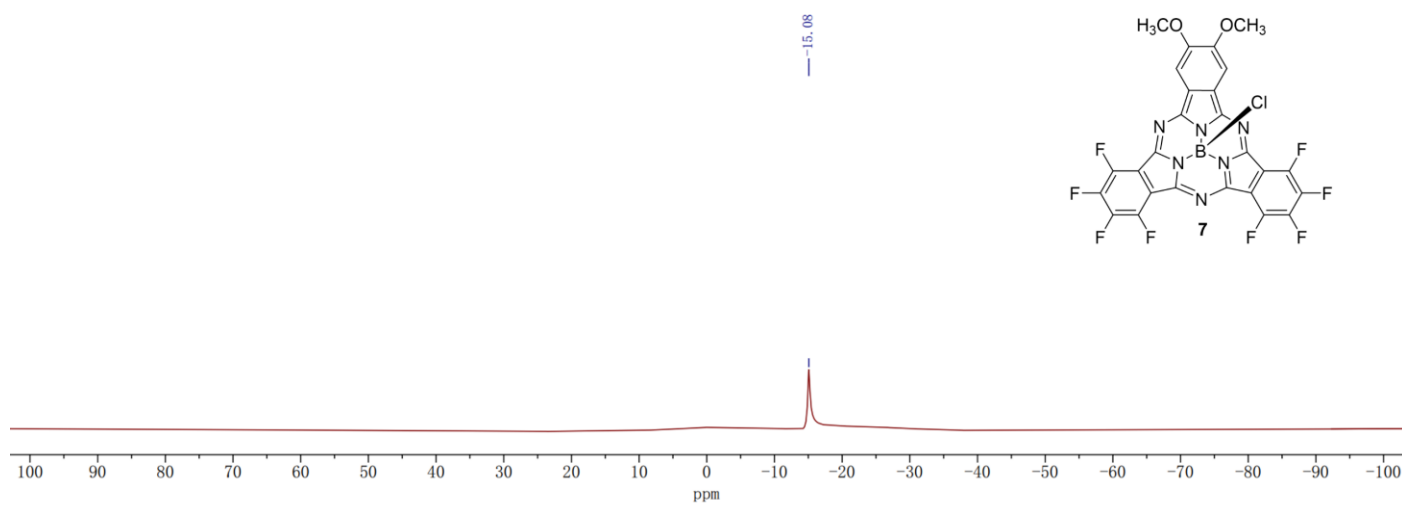

**Figure S13.**  $^{11}\text{B}$  NMR spectrum of **7** in  $\text{CDCl}_3$  (\* residual solvent).



iv. IR Spectra

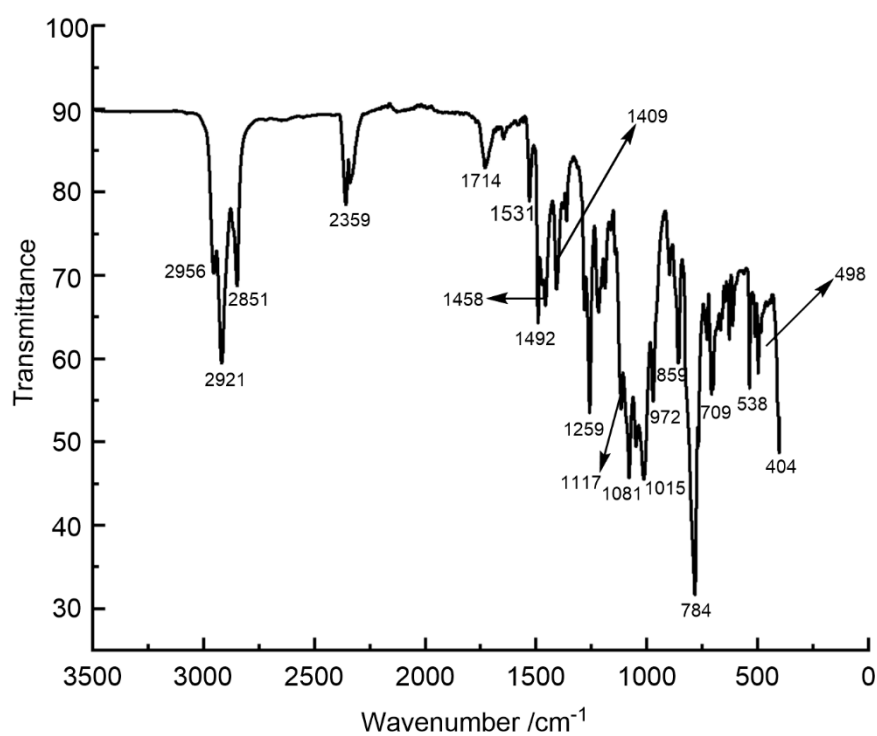

Figure S14. IR spectra of 5 in CH<sub>2</sub>Cl<sub>2</sub>.

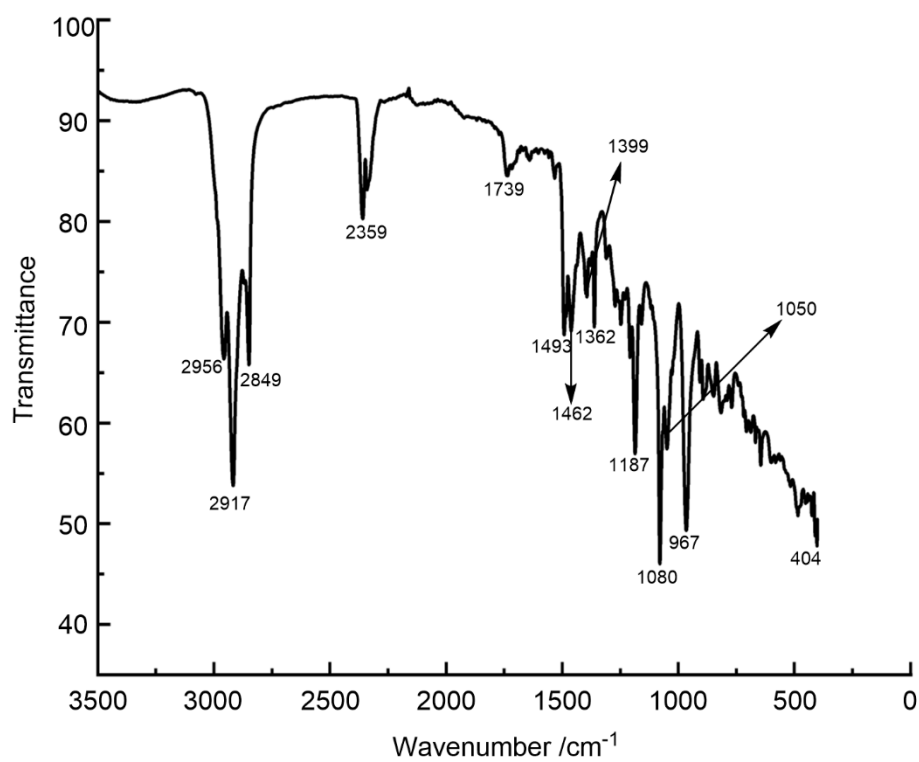

Figure S15. IR spectra of 6 in CH<sub>2</sub>Cl<sub>2</sub>.

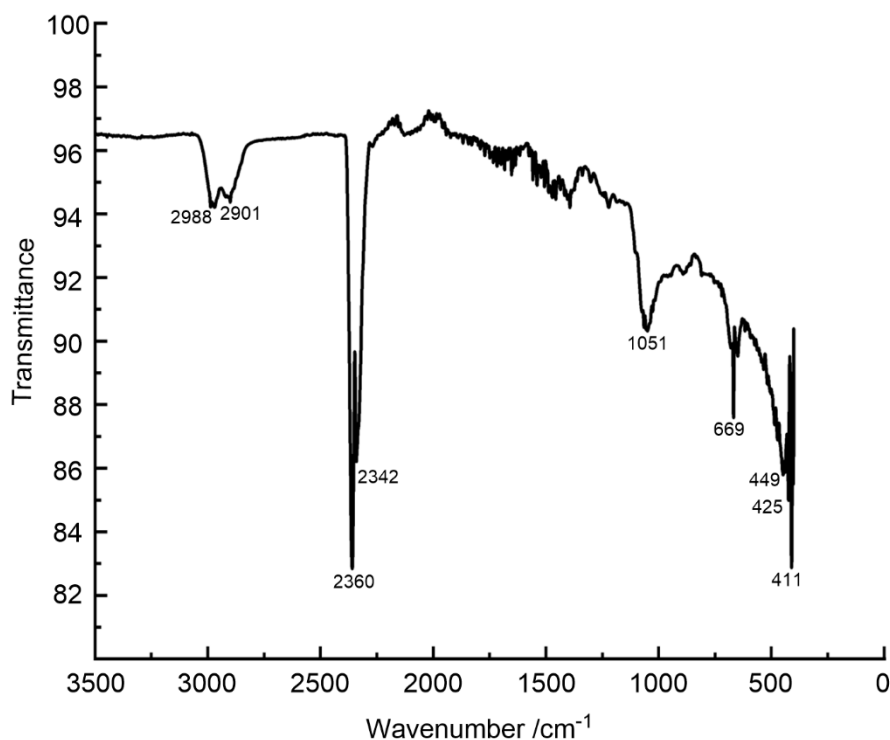

**Figure S16.** IR spectra of **7** in CH<sub>2</sub>Cl<sub>2</sub>.

#### v. Crystallographic data

**Table S1.** Crystal data and structure refinement.

|                                       |                                                                |                                             |                                                                  |
|---------------------------------------|----------------------------------------------------------------|---------------------------------------------|------------------------------------------------------------------|
| Moiety formula                        | C <sub>24</sub> BCl <sub>9</sub> F <sub>4</sub> N <sub>6</sub> | F (000)                                     | 804                                                              |
| Formula weight                        | 1643.26                                                        | $\theta$ (°) for data collection            | 2.611 to 27.450                                                  |
| Temperature (K)                       | 300                                                            | Index ranges                                | $-9 \leq h \leq 9$ , $-17 \leq k \leq 16$ , $-20 \leq l \leq 20$ |
| Wavelength (Å)                        | 0.71073                                                        | Reflection collected                        | 54438                                                            |
| Crystal system                        | Triclinic                                                      | Unique reflections                          | 6922 ( $R_{\text{int}} = 0.0922$ )                               |
| Space group                           | <i>P</i> -1                                                    | Completeness                                | 0.999                                                            |
| Unit cell dimensions                  | $a = 7.296(2)$ Å, $\alpha = 102.695(9)$                        | Absorption correction                       | multi-scan                                                       |
|                                       | $b = 13.497(4)$ Å, $\beta = 95.706(11)$                        | Max. and min. transmission                  | 0.7456, 0.6600                                                   |
|                                       | $c = 16.141(5)$ Å, $\gamma = 98.457(9)$                        | Data/restraints/parameters                  | 6922 / 86 / 452                                                  |
| Volume (Å <sup>3</sup> )              | 1519.3(8)                                                      | Goodness-of-fit on $F^2$                    | 1.013                                                            |
| <i>Z</i>                              | 1                                                              | Final <i>R</i> indices [ $I > 2\sigma(I)$ ] | 0.0534                                                           |
| Density (calcd.) (g/cm <sup>3</sup> ) | 1.796                                                          | $wR_2$ indices (all data)                   | 0.1205                                                           |
| $\mu$ (cm <sup>-1</sup> )             | 0.973                                                          | Large diff. peak and hole                   | 0.430, -0.326                                                    |
| Crystal size (mm <sup>3</sup> )       | 0.16 x 0.15 x 0.13                                             | CCDC no.                                    | 2220751                                                          |

**Table S2.** The length (Å) of C-F bonds and C-Cl bonds from the monocrystal of **6**.

| C1–F1  | C2–F2  | C3–F3  | C4–F4   | C5–Cl1  | C6–Cl2  |
|--------|--------|--------|---------|---------|---------|
| 1.343  | 1.338  | 1.351  | 1.347   | 1.709   | 1.726   |
| C7–Cl3 | C8–Cl4 | C9–Cl5 | C10–Cl6 | C11–Cl7 | C12–Cl8 |
| 1.718  | 1.717  | 1.709  | 1.719   | 1.716   | 1.711   |

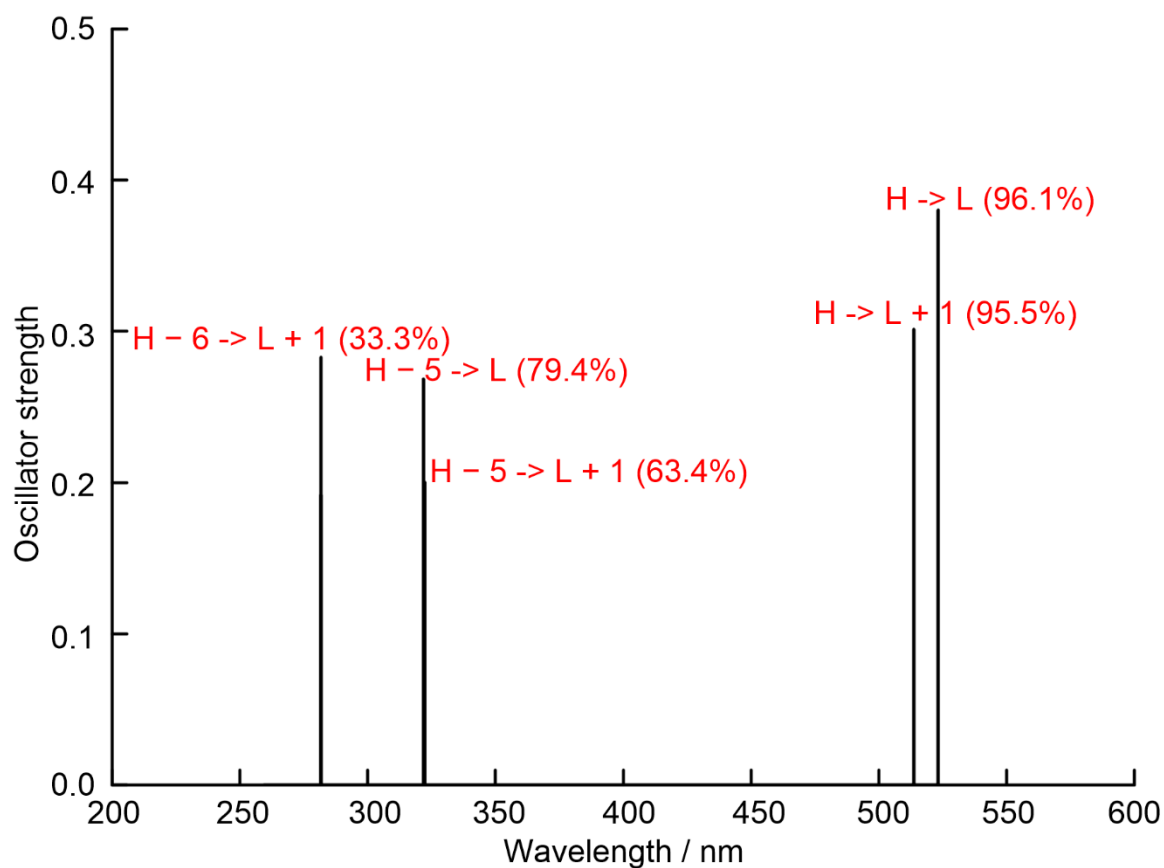

Figure S17. Vertical excitation energy of compound 5 calculated based on TDDFT.

Table S3. Selected transition energies, oscillator strengths, and major contributors of 5 calculated by TDDFT methods at the B3LYP/6-31G(d) level.

| $\lambda(\text{nm})$ | $f^a$   | Major contribution (weight%) <sup>b</sup>                                               |
|----------------------|---------|-----------------------------------------------------------------------------------------|
| 523.27               | 0.38010 | H -> L (96.1%)                                                                          |
| 513.60               | 0.30130 | H -> L + 1 (95.5%)                                                                      |
| 322.36               | 0.20020 | H - 5 -> L + 1 (63.4%), H - 4 -> L (14.8%), H - 3 -> L+1 (10.1%), H - 6 -> L + 1 (6.8%) |
| 321.74               | 0.26820 | H - 5 -> L (79.4%), H - 6 -> L (6.4%), H - 4 -> L + 1 (6.1%)                            |
| 281.71               | 0.28207 | H - 6 -> L + 1 (33.3%), H - 7 -> L (25.4%), H - 7 -> L + 1 (9.1%), H - 6 -> L (7.7%)    |

<sup>a</sup> : Oscillator strength. <sup>b</sup>: H and L denote the HOMO and LUMO, respectively.

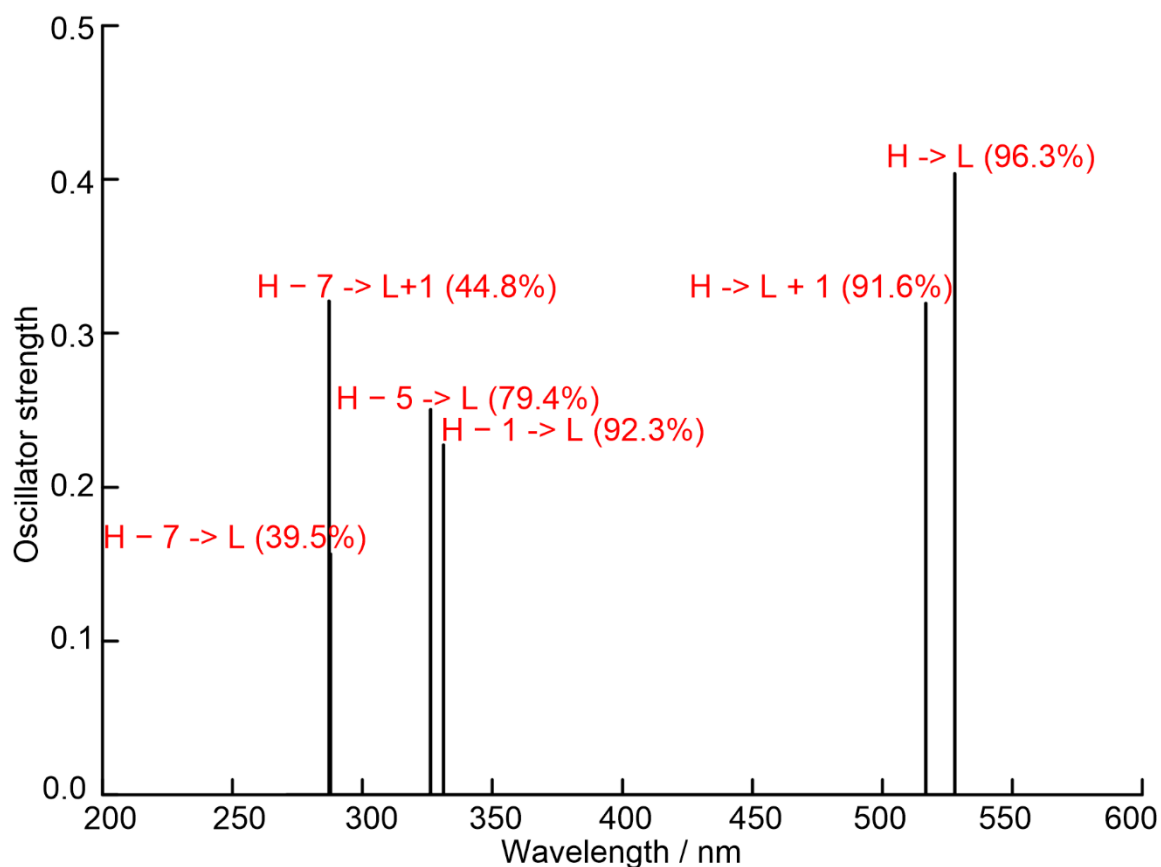

Figure S18. Vertical excitation energy of compound **6** calculated based on TDDFT.

**Table S4.** Selected transition energies, oscillator strengths, and major contributors of **6** calculated by TDDFT methods at the B3LYP/6-31G(d) level.

| $\lambda(\text{nm})$ | $f^a$   | Major contribution (weight%) <sup>b</sup>                                                                      |
|----------------------|---------|----------------------------------------------------------------------------------------------------------------|
| 528                  | 0.40380 | H -> L (96.3%)                                                                                                 |
| 517                  | 0.31960 | H -> L + 1 (91.6%)                                                                                             |
| 331                  | 0.22720 | H - 1 -> L (92.3%)                                                                                             |
| 326                  | 0.25050 | H - 5 -> L (79.4%), H - 3 -> L + 1 (6.8%)                                                                      |
| 288                  | 0.15660 | H - 7 -> L (39.5%), H - 6 -> L + 1 (32.3%), H - 11 -> L (8.6%)                                                 |
| 287                  | 0.32090 | H - 7 -> L+1 (44.8%), H - 6 -> L (19.6%), H - 8 -> L + 1 (7.2%), H - 11 -> L + 1 (5.9%), H - 5 -> L + 1 (5.1%) |

<sup>a</sup>: Oscillator strength. <sup>b</sup>: H and L denote the HOMO and LUMO, respectively.

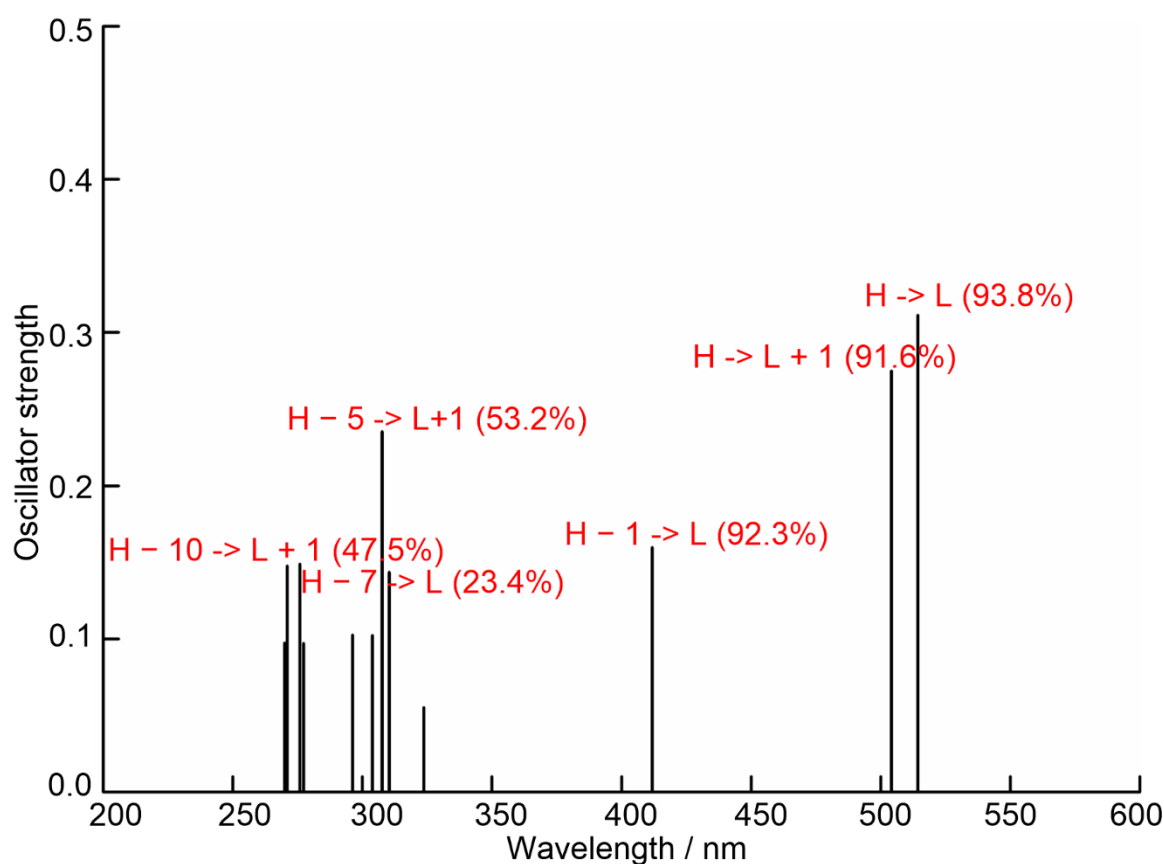

Figure S19. Vertical excitation energy of compound 7 calculated based on TDDFT.

Table S5. Selected transition energies, oscillator strengths, and major contributors of 7 calculated by TDDFT methods at the B3LYP/6-31G(d) level.

| $\lambda(\text{nm})$ | $f^a$   | Major contribution (weight%) <sup>b</sup>                                                                         |
|----------------------|---------|-------------------------------------------------------------------------------------------------------------------|
| 514                  | 0.31140 | H -> L (93.8%)                                                                                                    |
| 504                  | 0.27510 | H -> L + 1 (91.6%)                                                                                                |
| 411                  | 0.15980 | H - 1 -> L (92.3%)                                                                                                |
| 308                  | 0.23540 | H - 5 -> L+1 (53.2%), H -> L + 4 (15.4%), H -> L + 3 (7.9%), H -> L + 2 (7.7%), H - 4 -> L (5.2%)                 |
| 276                  | 0.14870 | H - 7 -> L (23.4%), H - 6 -> L + 1 (16.7%), H - 7 -> L + 1 (15.3%), H - 8 -> L + 1 (11.1%), H - 10 -> L (9.3%)    |
| 271                  | 0.14770 | H - 10 -> L + 1 (47.5%), H - 10 -> L (12.1%), H - 6 -> L + 1 (8.2%), H - 1 -> L + 4 (6.0%), H - 1 -> L + 2 (5.2%) |

<sup>a</sup> : Oscillator strength. <sup>b</sup>: H and L denote the HOMO and LUMO, respectively.

## **vii. References**

1. Sheldrick, G.M. Experimental phasing with SHELXC/D/E: combining chain tracing with density modification. *Acta Crystallographica Section D: Biological Crystallography*. **2010**, *66*, 479-85.
2. Yoshioka, S.; Inokuma, Y.; Hoshino, M.; Sato, T.; Fujita, M. Absolute structure determination of compounds with axial and planar chirality using the crystalline sponge method. *Chemical science*. **2015**, *6*, 3765-8.
3. Sheldrick, G.M. Crystal structure refinement with SHELXL. *Acta Crystallographica Section C: Structural Chemistry*. **2015**, *71*, 3–8.
